# Supplementary material for: User centered clinical decision support to implement initiation of buprenorphine for opioid use disorder in the emergency department: EMBED pragmatic cluster randomized controlled trial
Source: PubMed Central journal article supplement — BMJ. 2022 Jun 27;377:e069271. doi: 10.1136/bmj-2021-069271 (PMC9231533; doi:10.1136/bmj-2021-069271), 2022-06-27
Supplement: mele069271.ww1.pdf [file mele069271.ww1.pdf]

## IT Workflow: Initiating buprenorphine in the ED using the 'EMBED' clinical decision support application

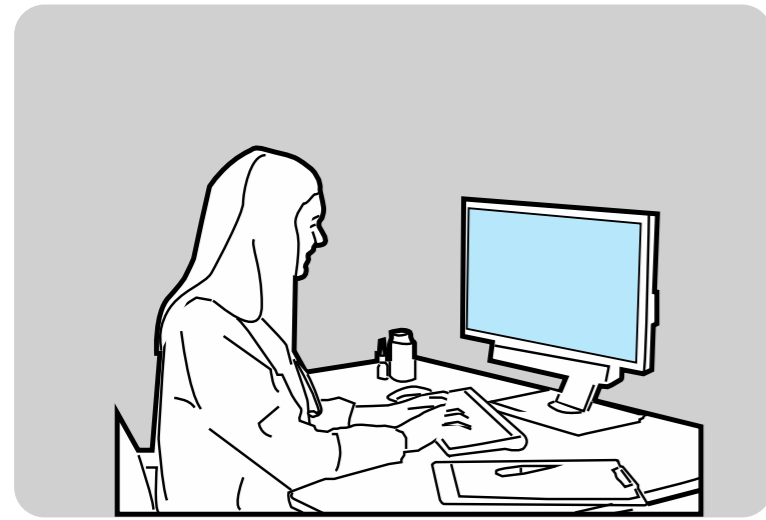

**1** ED clinicians will conduct their usual workflow within their current EHR environment.

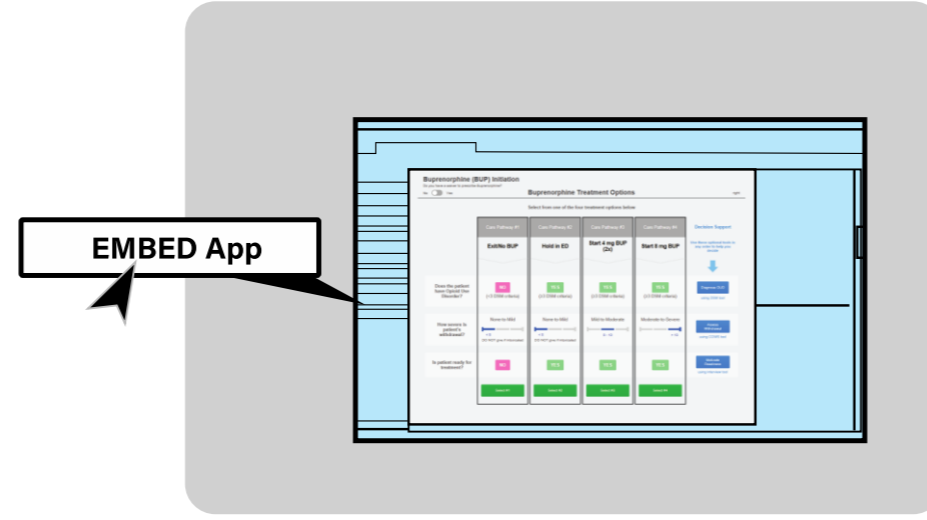

**2** When the appropriate patient is identified, the clinician can click on the button to launch the 'EMBED' decision support application without leaving the EHR.

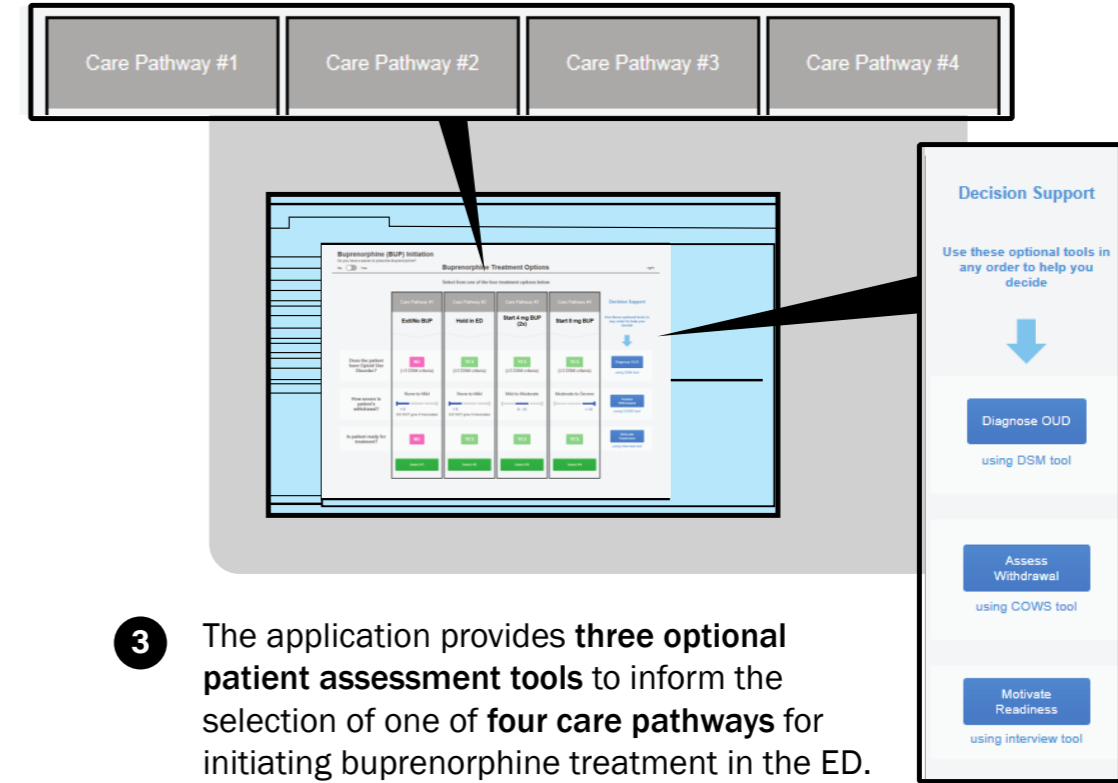

**3** The application provides **three optional patient assessment tools** to inform the selection of one of **four care pathways** for initiating buprenorphine treatment in the ED.

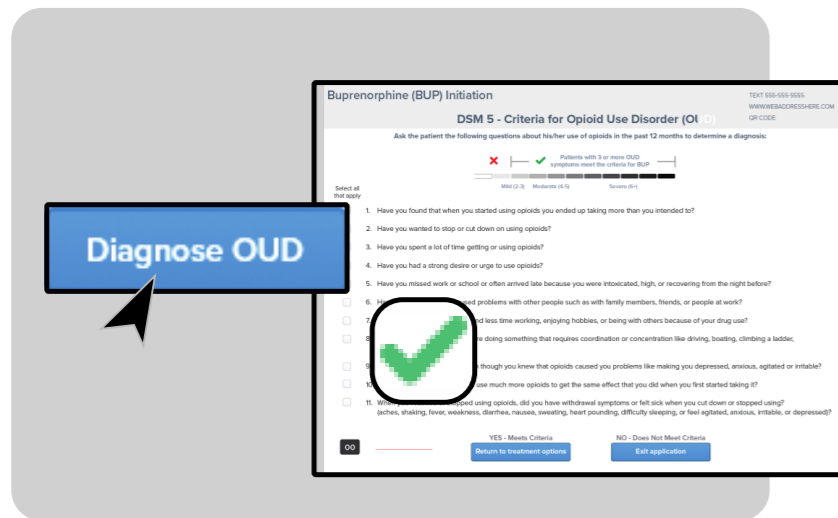

**4** Other members of the care team can complete all or just some of the assessment tools, specifically for diagnosing OUD, scoring withdrawal symptoms, and determining a patient's readiness for treatment.

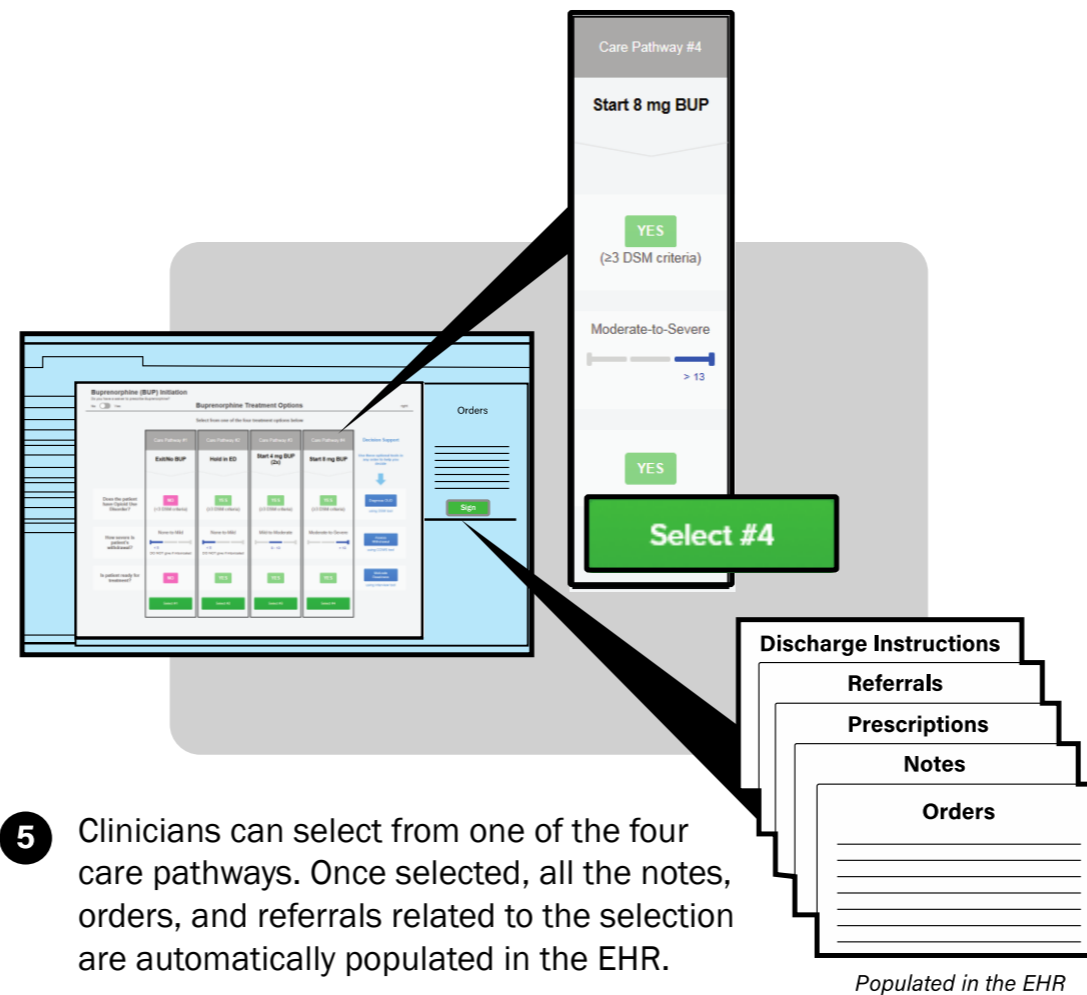

**5** Clinicians can select from one of the four care pathways. Once selected, all the notes, orders, and referrals related to the selection are automatically populated in the EHR.

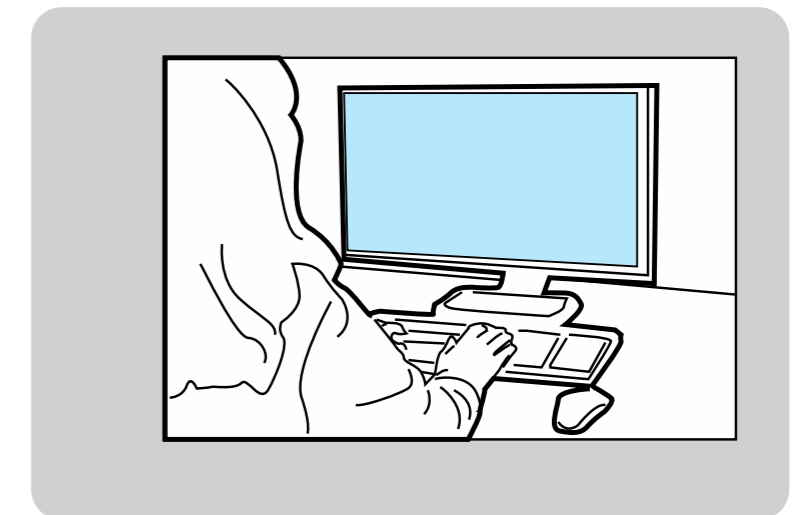

**6** Users can exit the application without leaving the EHR once the care pathway has been selected, or at any time in the process.

Populated in the EHR

# Buprenorphine (BUP) Initiation

Do you have a waiver to prescribe Buprenorphine?

No  Yes

## Buprenorphine Treatment Options

right

Select from one of the four treatment options below

|                                            | Care Pathway #1                                                                            | Care Pathway #2                                                                            | Care Pathway #3                                                       | Care Pathway #4                                                       | Decision Support                                                                         |
|--------------------------------------------|--------------------------------------------------------------------------------------------|--------------------------------------------------------------------------------------------|-----------------------------------------------------------------------|-----------------------------------------------------------------------|------------------------------------------------------------------------------------------|
|                                            | <b>Exit/No BUP</b>                                                                         | <b>Hold in ED</b>                                                                          | <b>Start 4 mg BUP (2x)</b>                                            | <b>Start 8 mg BUP</b>                                                 | <b>Decision Support</b><br>Use these optional tools in any order to help you decide<br>↓ |
| Does the patient have Opioid Use Disorder? | <b>NO</b><br>(<3 DSM criteria)                                                             | <b>YES</b><br>(≥3 DSM criteria)                                                            | <b>YES</b><br>(≥3 DSM criteria)                                       | <b>YES</b><br>(≥3 DSM criteria)                                       | <b>Diagnose OUD</b><br>using DSM tool                                                    |
| How severe is patient's withdrawal?        | None-to-Mild<br>[Progress bar: 0 to 8, filled to < 8]<br>< 8<br>DO NOT give if intoxicated | None-to-Mild<br>[Progress bar: 0 to 8, filled to < 8]<br>< 8<br>DO NOT give if intoxicated | Mild-to-Moderate<br>[Progress bar: 0 to 13, filled to 8-13]<br>8 - 13 | Moderate-to-Severe<br>[Progress bar: 0 to 13, filled to > 13]<br>> 13 | <b>Assess Withdrawal</b><br>using COWS tool                                              |
| Is patient ready for treatment?            | <b>NO</b>                                                                                  | <b>YES</b>                                                                                 | <b>YES</b>                                                            | <b>YES</b>                                                            | <b>Motivate Readiness</b><br>using interview tool                                        |
|                                            | <b>Select #1</b>                                                                           | <b>Select #2</b>                                                                           | <b>Select #3</b>                                                      | <b>Select #4</b>                                                      |                                                                                          |

**Supplementary Table.** Ongoing OUD quality improvement initiatives at study sites during EMBED trial

|                                                   | Concurrent non-EMBED projects promoting EMBED like outcomes                                                                                    |                                                 |                                                                                                                                                       | Mode of physician training on how to use Intervention                            |                           | If financial incentives offered through EMBED trial to promote X-waiver training | Support staff in ED for warm hand-off and coordination of MOUD referral                             | COVID-19 related Interruptions or change in protocol                                                                                                                                                                                                |
|---------------------------------------------------|------------------------------------------------------------------------------------------------------------------------------------------------|-------------------------------------------------|-------------------------------------------------------------------------------------------------------------------------------------------------------|----------------------------------------------------------------------------------|---------------------------|----------------------------------------------------------------------------------|-----------------------------------------------------------------------------------------------------|-----------------------------------------------------------------------------------------------------------------------------------------------------------------------------------------------------------------------------------------------------|
|                                                   | MOUD referral                                                                                                                                  | X-waiver Training                               | Naloxone distribution                                                                                                                                 | Mode of physician training                                                       | If any incentives offered |                                                                                  |                                                                                                     |                                                                                                                                                                                                                                                     |
| <b>Yale New Haven Health</b>                      | Yes, Intervention & Control sites                                                                                                              | Yes, Intervention & Control sites               | Yes, Intervention & Control sites                                                                                                                     | In-person 1:1 training;                                                          | Yes                       | None                                                                             | Health promotion advocates (HPAs) present at one Intervention site & all Control sites              | <p>No reported interruptions in patient access to community MOUD sites.</p> <p>No change made to study protocol, but ED clinicians at Intervention and Control</p> <p>Sites were urged to prescribe longer length of Buprenorphine prescription</p> |
| <b>Baystate Health</b>                            | Yes, at Intervention sites, not at Control sites                                                                                               | Yes, both at Intervention & Control sites       | Yes (ED take-home Narcan program), at one Intervention site starting August, 2020 and eventually extended to all community hospitals by October, 2020 | Mix of in-person trainings, emails, presentation at faculty-resident conference; | None                      | None                                                                             | RNs and Mental Health coordinators present at Intervention sites                                    |                                                                                                                                                                                                                                                     |
| <b>Colorado Health System</b>                     | Yes, both at Intervention & Control sites                                                                                                      | Yes, only Control sites (Primary targets PA/NP) | Narcan available without a prescription at any pharmacy, statewide in Colorado. Hence not routinely given out from the ED                             | Instructional materials sent to clinicians via emails;                           | None                      | Yes, only Intervention sites                                                     | Addiction counselor, crisis assessment counselors, social workers present at all Intervention sites |                                                                                                                                                                                                                                                     |
| <b>University of Alabama Health System</b>        | Robust Opiate Use Disorder Power plan at Control sites which supports (1) ED initiation of Bupe, (2) Naloxone distribution, (3) MOUD referral; |                                                 |                                                                                                                                                       | In-person training, emails and posted on the ED website                          | None                      | Yes, both at Intervention & Control sites                                        | Care coordinators, on-call peer navigators present at Control sites                                 |                                                                                                                                                                                                                                                     |
| <b>University of North Carolina Health System</b> | N/A                                                                                                                                            | N/A                                             | N/A                                                                                                                                                   | In-person presentations, emails                                                  | None                      | Yes, both at Intervention & Control sites                                        | ED social worker present at one Control site                                                        |                                                                                                                                                                                                                                                     |
